# Supplementary material for: Cyto-toxicity, biocompatibility and cellular response of carbon dots–plasmonic based nano-hybrids for bioimaging
Source: Royal Society of Chemistry journal article supplement (doi:10.1039/c7ra01423f), 2017-01-01
Supplement: c7ra01423f1.pdf [file c7ra01423f1.pdf]

## Electronic Supporting Information

*for*

### **Cyto-toxicity, Biocompatibility and Cellular Response of Carbon Dots – Plasmonic Based Nano-hybrids for Bioimaging**

**A. N. Emam,<sup>a,b,†</sup> Samah A. Loutfy,<sup>c</sup> A. A. Mostafa,<sup>a,b</sup> H. Awad<sup>d</sup> and M.  
B. Mohamed<sup>e,f</sup>**

- a) Ceramics and Building Materials Department, National Research Centre, Cairo, Egypt*
- b) Nanomedicine and Tissue Engineering Laboratory, Medical Research Centre of Excellence, National Research Centre (NRC), Cairo, Egypt*
- c) Virology and Immunology Unit, Cancer Biology Department, National Cancer Institute, Cairo University, Cairo, Egypt*
- d) Tanning Materials and Leather Technology Department, National Research Centre, Cairo, Egypt*
- e) National Institute of Laser Enhanced Sciences (NILES), Cairo University, Cairo, Egypt*
- f) Egyptian Nanotechnology Center (EGNC), Cairo University, Zayed City, Giza, Egypt*

## Figures

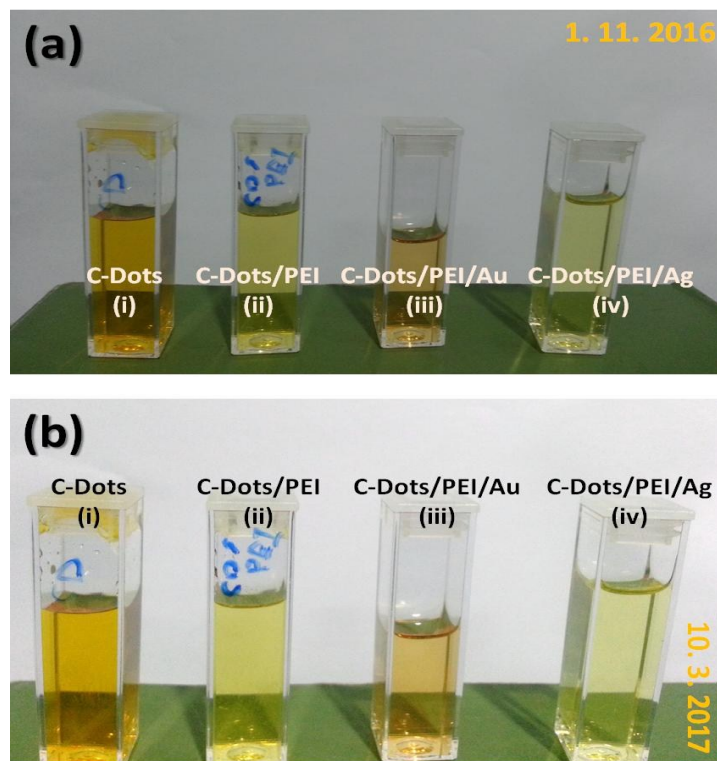

**Fig. S1** Photographs of PEI/C-Dots Hybrid Nanocomposites with both Au NPs and Ag NPs solutions at zero time (a), and after 3 months of preparation (b).

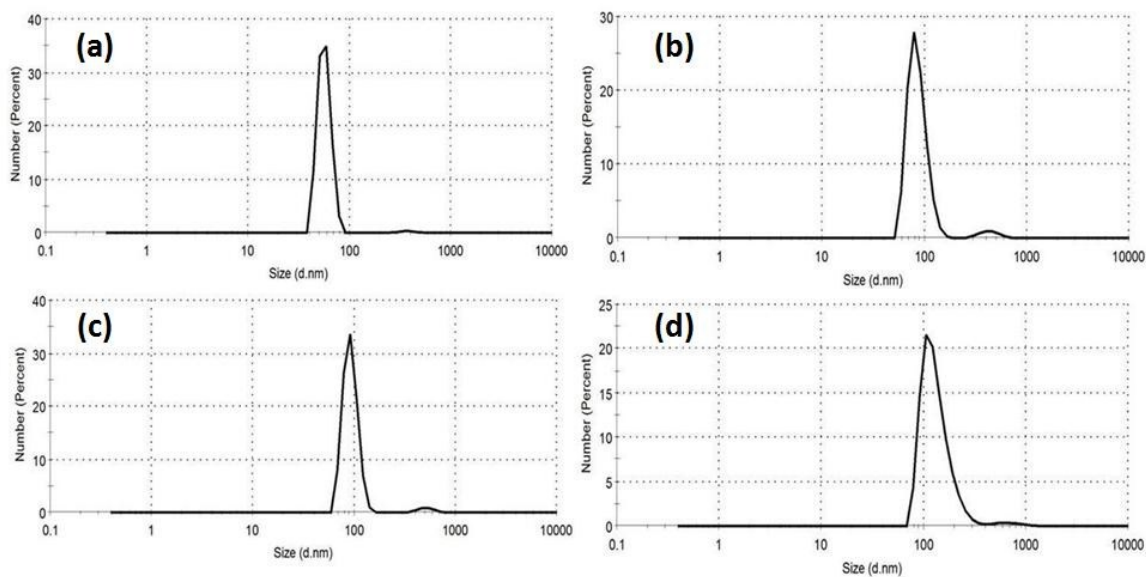

**Fig. S2** Hydrodynamic diameter estimated by DLS technique for (a) C-Dots, (b) C-Dots/PEI, (c) C-Dots/PEI/Au and (d) C-Dots/PEI/Ag NanoHybrids.

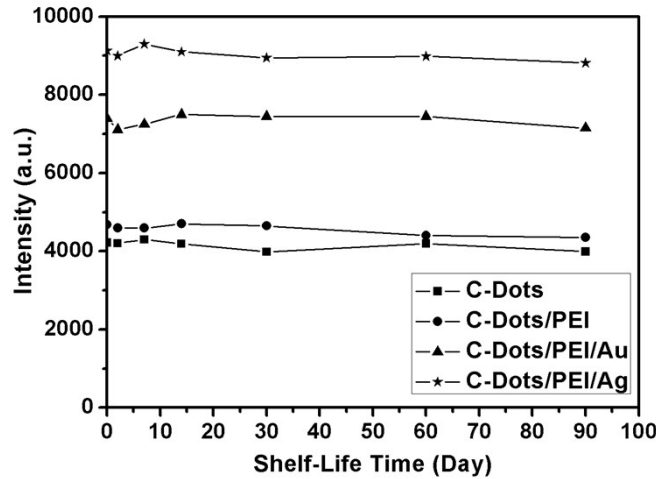

**Fig. S3** The long-term Photoluminescence Stability for C-Dots, C-Dots/PEI, C-Dots/PEI/Au and C-Dots/PEI/Ag hybrid nanocomposites after shelf-life storage up to 3 months.

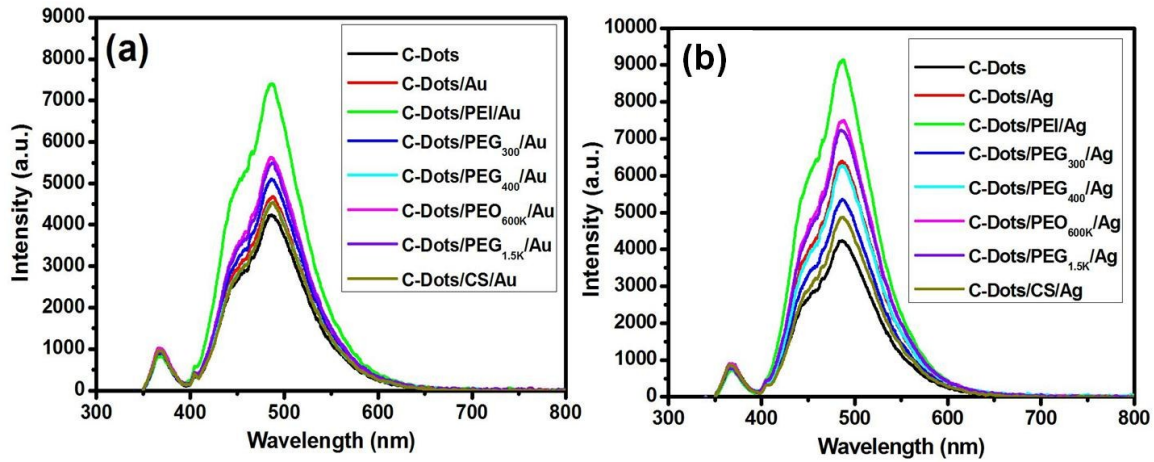

**Fig. S4** The Plasmonic Effect on the PLE Properties of C-Dots in Presence of different polymeric spacers upon excitation at steady-state condition ( $\lambda_{\text{ex}} \sim 366$  nm) for (a) C-Dots/Spacer/Au and (b) C-Dots/Spacer/Ag hybrid nanocomposites.

**Table S1.** Influence of Plasmonic nanoparticles (e.g. Au and AgNPs) on the PLE properties of C-Dots in presence of different spacers

| Polymeric Spacer | Au NPs                             |                                 |                                                                                          |                                                                          | Ag NPs                             |                                 |                                                                                          |                                                                          |
|------------------|------------------------------------|---------------------------------|------------------------------------------------------------------------------------------|--------------------------------------------------------------------------|------------------------------------|---------------------------------|------------------------------------------------------------------------------------------|--------------------------------------------------------------------------|
|                  | $\lambda_{\text{ex}}^{(a)}$ 366 nm |                                 | QY/QY <sub>Dye</sub> <sup>(d)</sup><br>Steady-State<br>$\lambda_{\text{ex}} \sim 366$ nm | FWHM <sup>(e)</sup><br>Steady-State<br>$\lambda_{\text{ex}} \sim 366$ nm | $\lambda_{\text{ex}}^{(a)}$ 366 nm |                                 | QY/QY <sub>Dye</sub> <sup>(d)</sup><br>Steady-State<br>$\lambda_{\text{ex}} \sim 366$ nm | FWHM <sup>(e)</sup><br>Steady-State<br>$\lambda_{\text{ex}} \sim 366$ nm |
|                  | I <sup>(b)</sup>                   | I/I <sub>0</sub> <sup>(c)</sup> |                                                                                          |                                                                          | I <sup>(b)</sup>                   | I/I <sub>0</sub> <sup>(c)</sup> |                                                                                          |                                                                          |
| Pure             | (I <sub>0</sub> ) 4223.69          | -                               | 22.468                                                                                   | 33.60484                                                                 | (I <sub>0</sub> ) 4223.69          | -                               | 22.468                                                                                   | 33.60484                                                                 |
| No Spacer        | 4683.54                            | 1.11                            | 49.669                                                                                   | 86.74477                                                                 | 6397.74                            | 1.51                            | 70.876                                                                                   | 87.98712                                                                 |
| PEI 1.2 K        | 7403.64                            | 1.75                            | 55.52                                                                                    | 30.56937                                                                 | 9134.23                            | 2.16                            | 77.213                                                                                   | 17.44447                                                                 |
| PEG 300          | 5103.11                            | 1.21                            | 42.385                                                                                   | 28.74657                                                                 | 5358.99                            | 1.27                            | 55.683                                                                                   | 86.61188                                                                 |
| PEG 400          | 4541.93                            | 1.08                            | 37.196                                                                                   | 27.70977                                                                 | 6271.99                            | 1.49                            | 52.505                                                                                   | 27.20729                                                                 |
| PEO 600 K        | 5633.71                            | 1.33                            | 46.31                                                                                    | 28.92912                                                                 | 7499.62                            | 1.78                            | 64.795                                                                                   | 23.93524                                                                 |
| PEG 1.5 K        | 5490.96                            | 1.30                            | 28.69                                                                                    | 48.32572                                                                 | 7236.54                            | 1.71                            | 60.569                                                                                   | 27.67129                                                                 |
| CS Low M.wt.     | 4539.02                            | 1.07                            | 37.054                                                                                   | 28.27469                                                                 | 4875.24                            | 1.15                            | 37.929                                                                                   | 27.93471                                                                 |

<sup>(a)</sup>  $\lambda_{\text{ex}}$ : excitation wavelength. <sup>(b)</sup>  $\lambda_{\text{em}}$ : PLE wavelength. <sup>(c)</sup> I/I<sub>0</sub>: Relative Enhancement Factor. <sup>(d)</sup> QY/QY<sub>Dye</sub>: Relative quantum yield. <sup>(e)</sup> FWHM: Full width at half-maximum

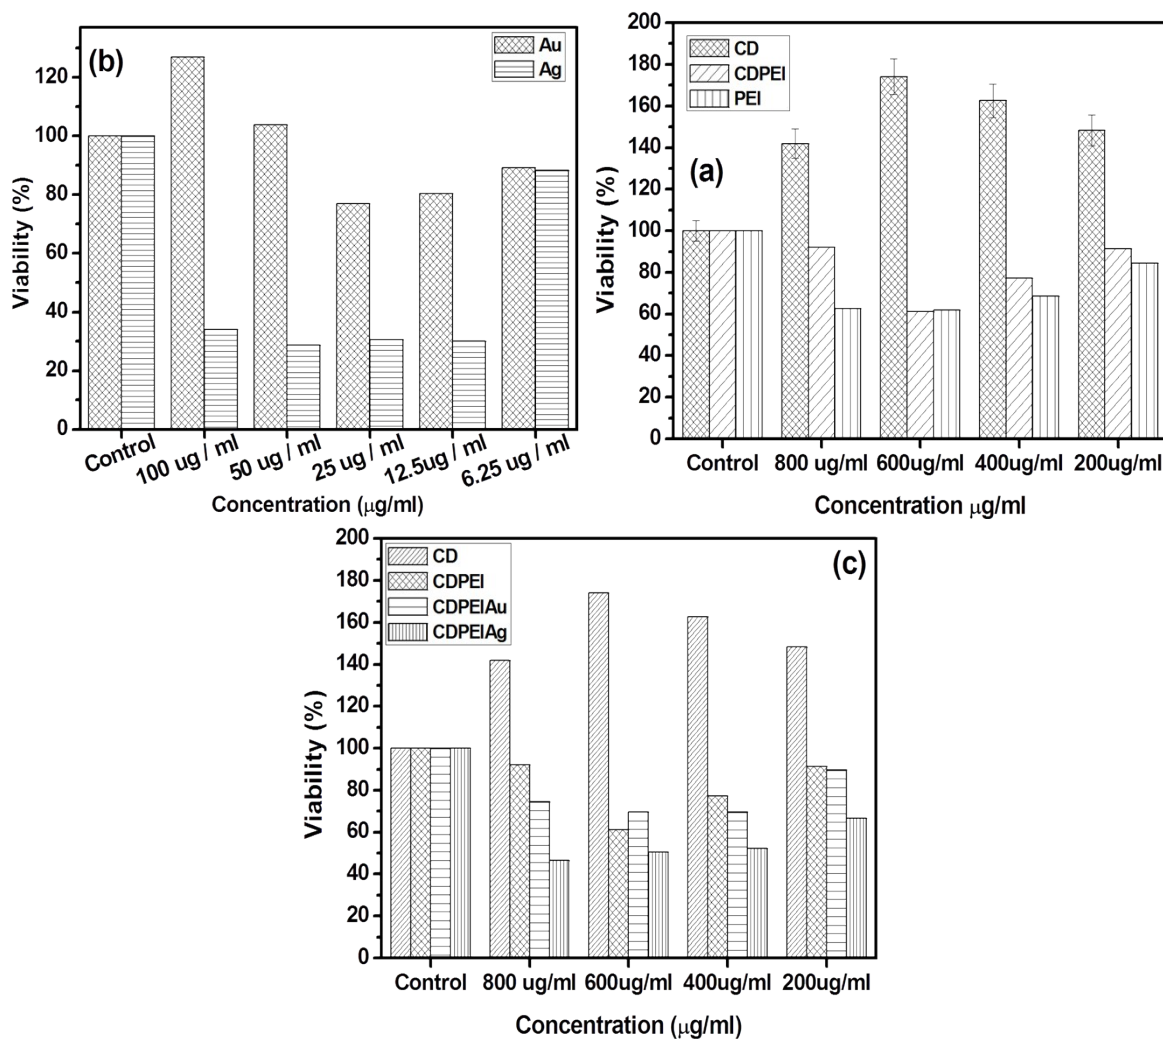

**Fig. S5** Cyto-toxicity of (a) C-Dots, (b) Plasmonic nanostructures (Au and Ag NPs) and (c) C-Dots hybrid nanocomposites (i.e. CD-PEI, CD/PEI/Au and CD/PEI/Ag) against Vero normal cells by using MTT assays, illustrating percentage cell viability when compared to non-treated cells being arbitrarily assigned 100% viability upon exposing the cells to different concentration for 48 h.

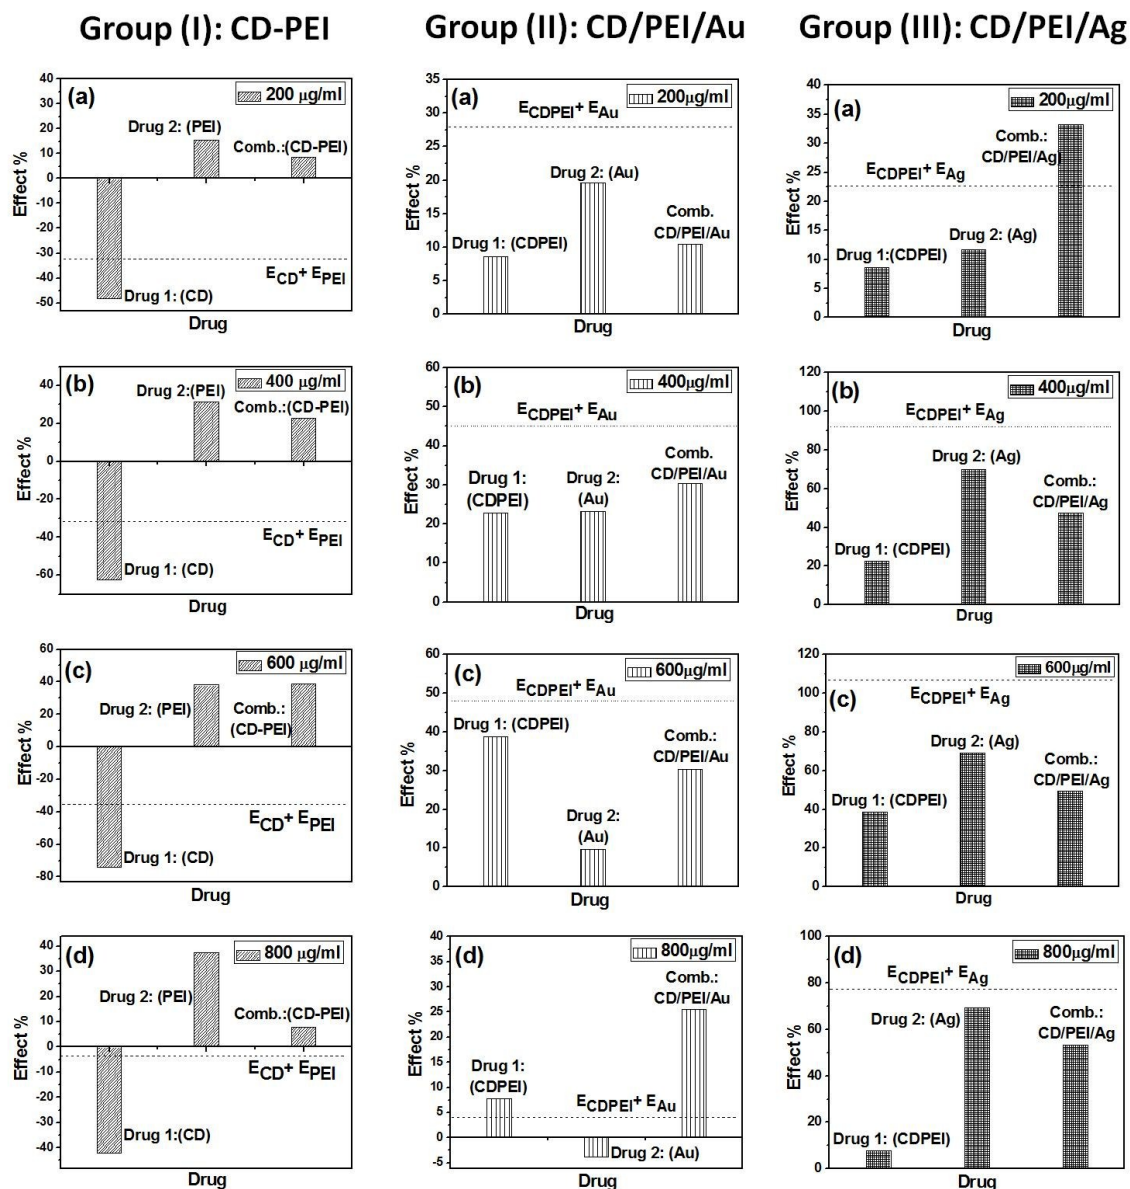

**Fig. S6** Cellular response of *Vero Cells*, and the combination approach effect based-on combination index (CI) calculations of the as-prepared hybrid nanocomposites based-on C-Dots including PEI coated C-Dots (Group I), C-Dots/PEI/Au (Group II) and C-Dots/PEI/Ag (Group III) Nanohybrids. *This calculation based on based on Response Additivity model.*



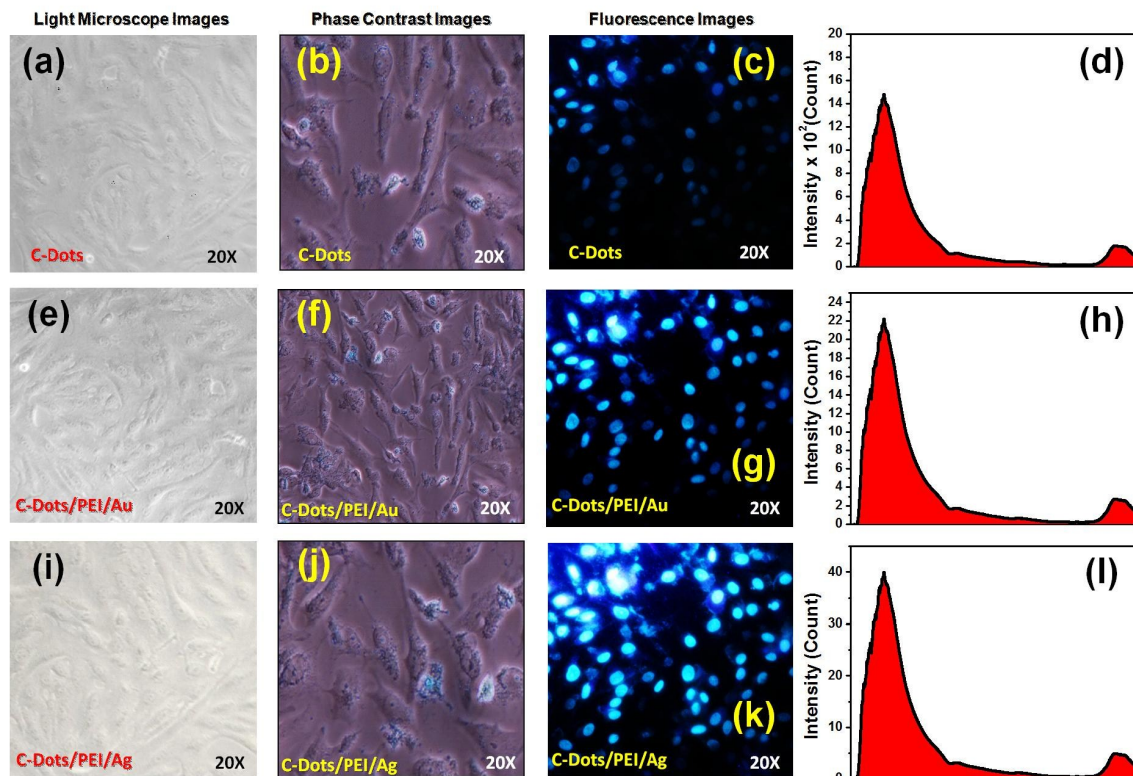

**Fig. S7** Bright field (a, e and i), Phase contrast (b, f and j) and fluorescence images (c, g and k) of HepG-2 cells after 24 hr incubation, and the intensity histogram (d, h and l) of fluorescence images. (a, b and c) for C-Dots. (e, f and g) for C-Dots/PEI/Au NanoHybrids. (i, j and k) for C-Dots/PEI/Ag NanoHybrids.

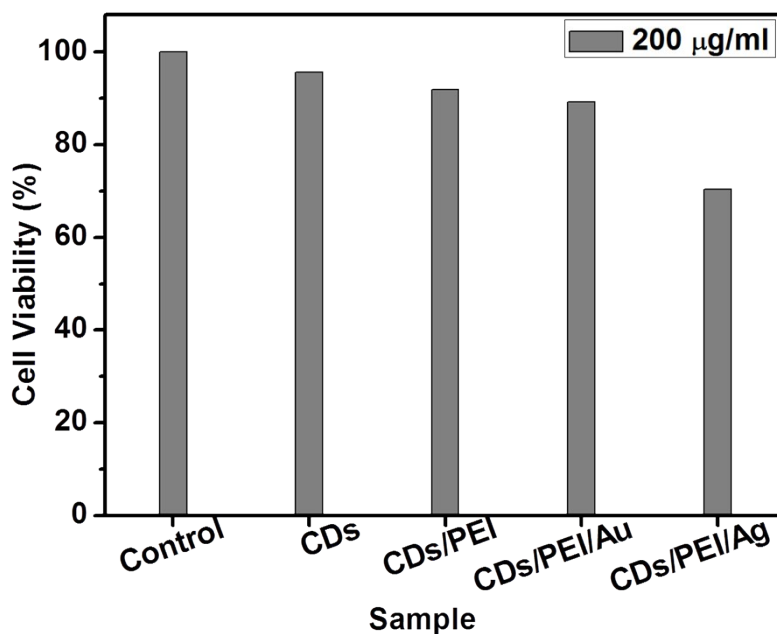

**Fig. S8** Cyto-toxicity for each of C-Dots, PEI coated C-Dots, C-Dots/PEI/Au and C-Dots/PEI/Ag NanoHybrids against human liver carcinoma (HepG-2) cell lines based-on MTT assay after exposure to the dose of 200 µg/ml.
